# Supplementary material for: Extraction of Bioactive Compounds for Antioxidant, Antimicrobial, and Antidiabetic Applications
Source: MDPI journal article supplement (doi:10.3390/molecules27185935), 2022-09-13
Supplement: s1 [file s1]

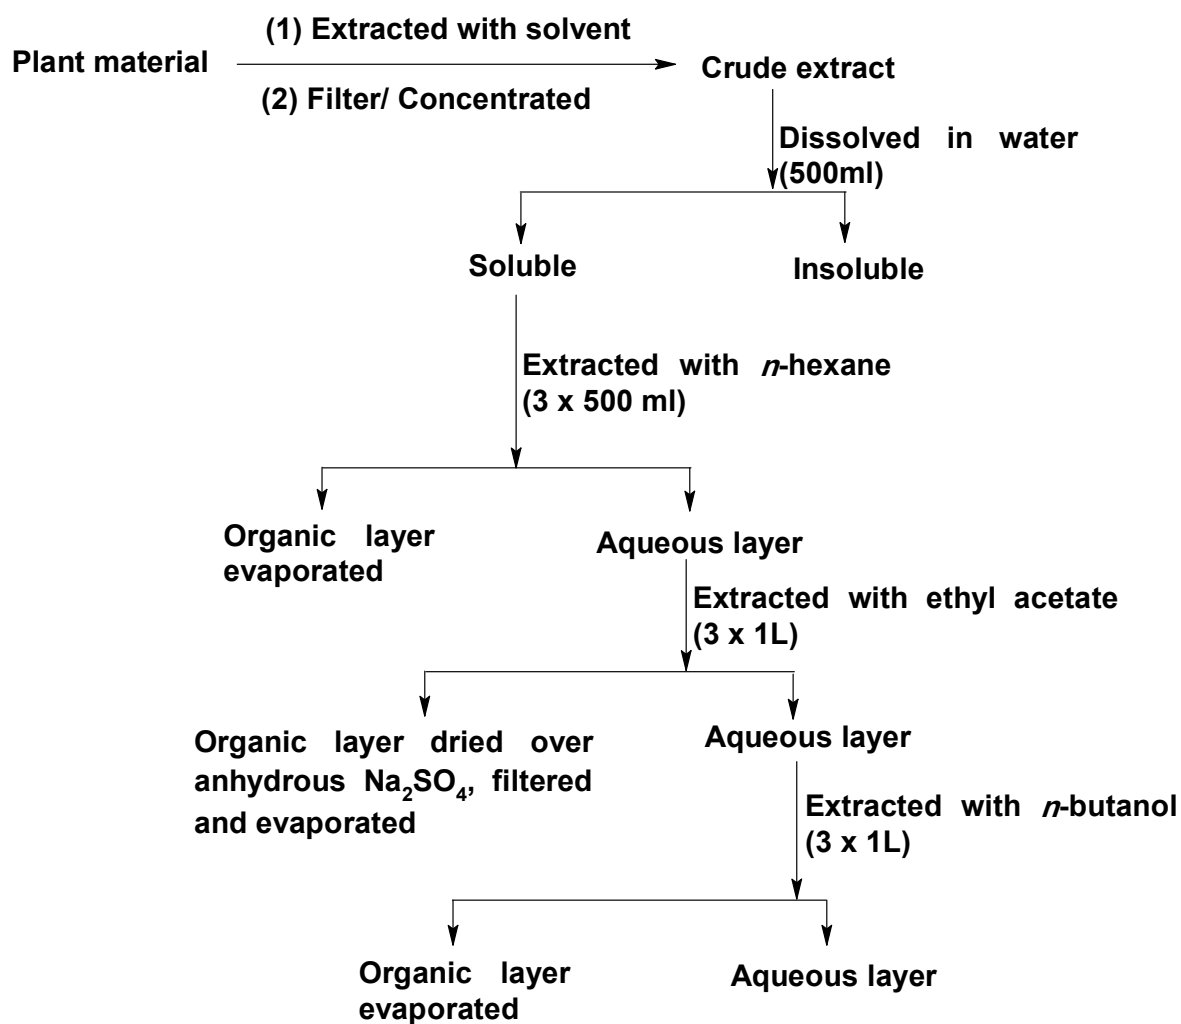

**SS1.** Scheme followed for the extraction of *A. arvensis*, & *A. americana*.

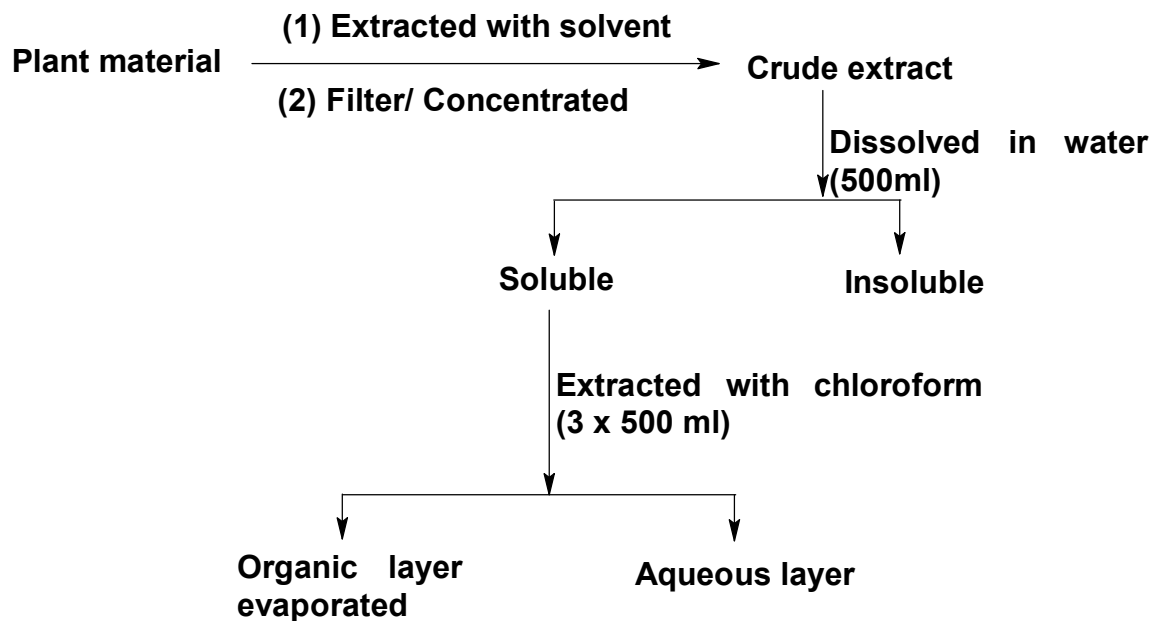

**SS2.** The scheme followed for the extraction of *C. colocynthis*, *S. nigrum*, *S. surattense*, and *C. procera*.

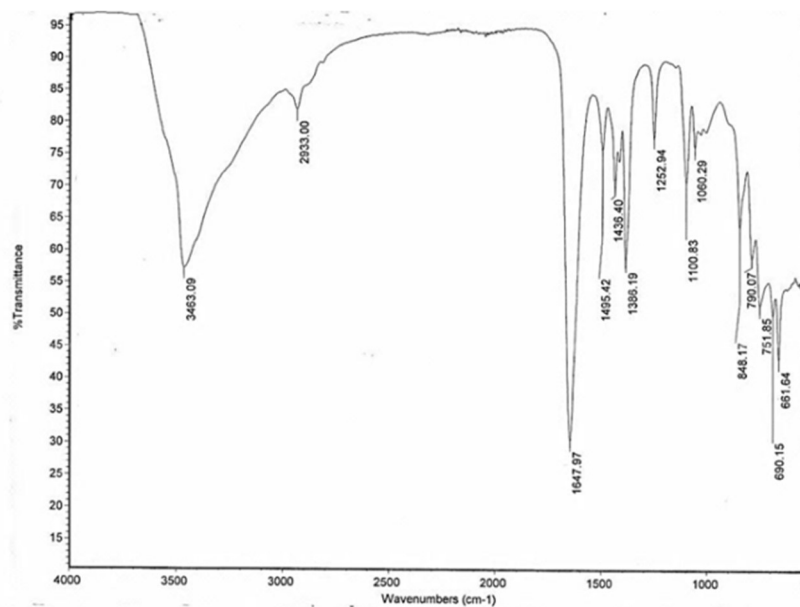

**S 1.** FT-IR spectrum of *S. surattense* chloroform fraction of leaves.

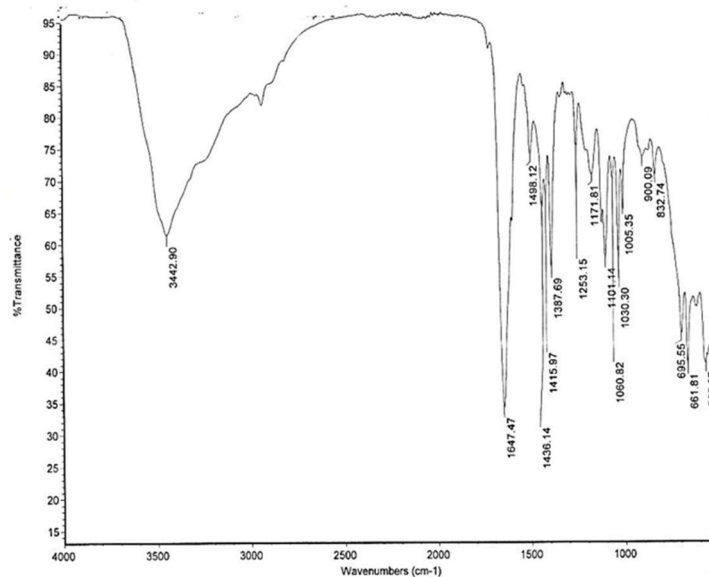

**S 2.** FT-IR spectrum of *S. surrattense* chloroform fraction of fruit extract.

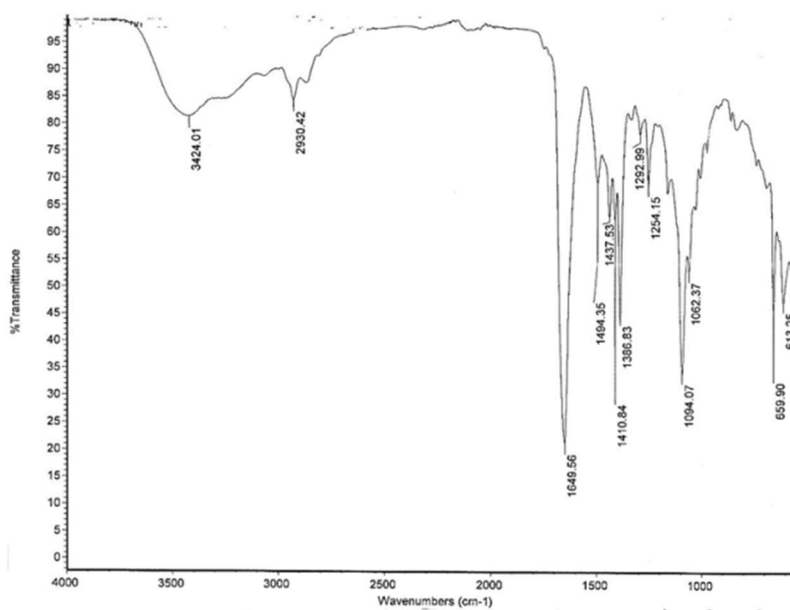

**S 3.** FT-IR spectrum of *S. surrattense* aqueous fraction of leaf extract.

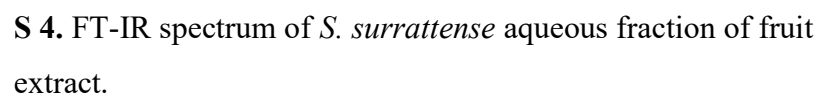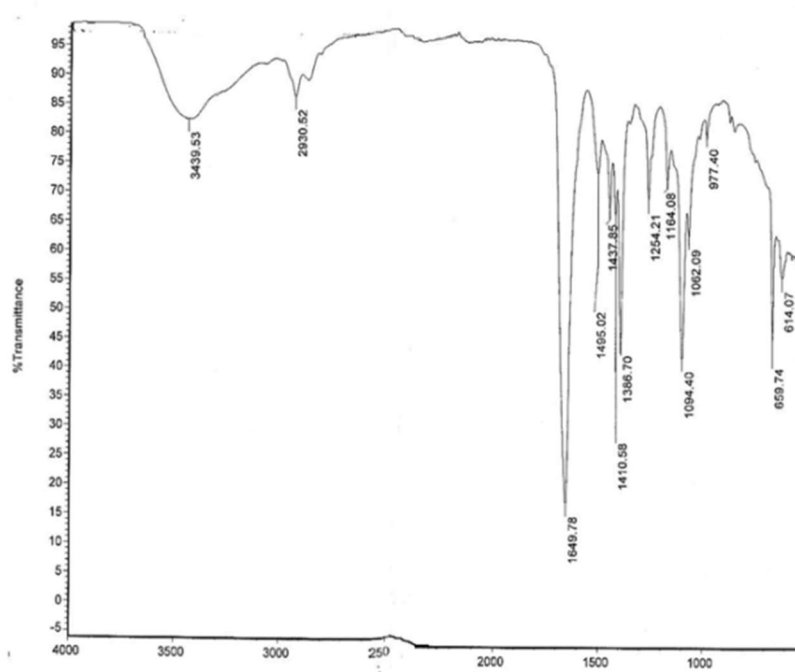

S 5. FT-IR spectrum of aqueous fraction of *C. procera*.

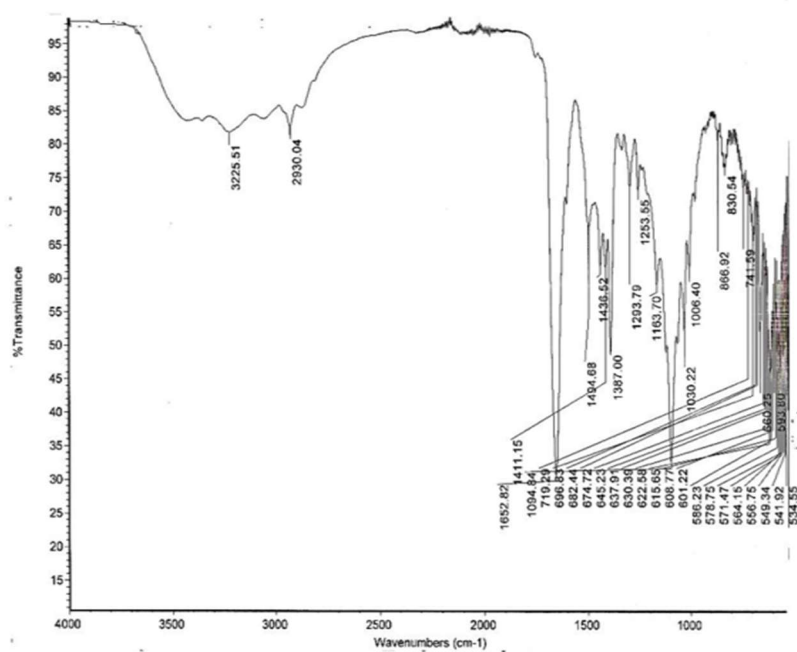

S 6. FT-IR spectrum of aqueous fraction of *C. colocynthis*.

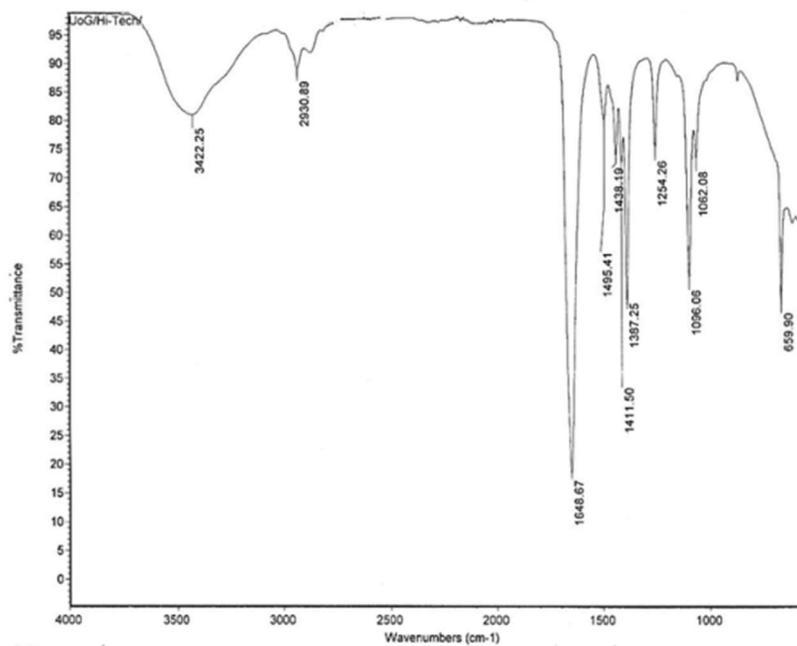

S 7. FT-IR spectrum of butanol fraction of *A. arvensis*.

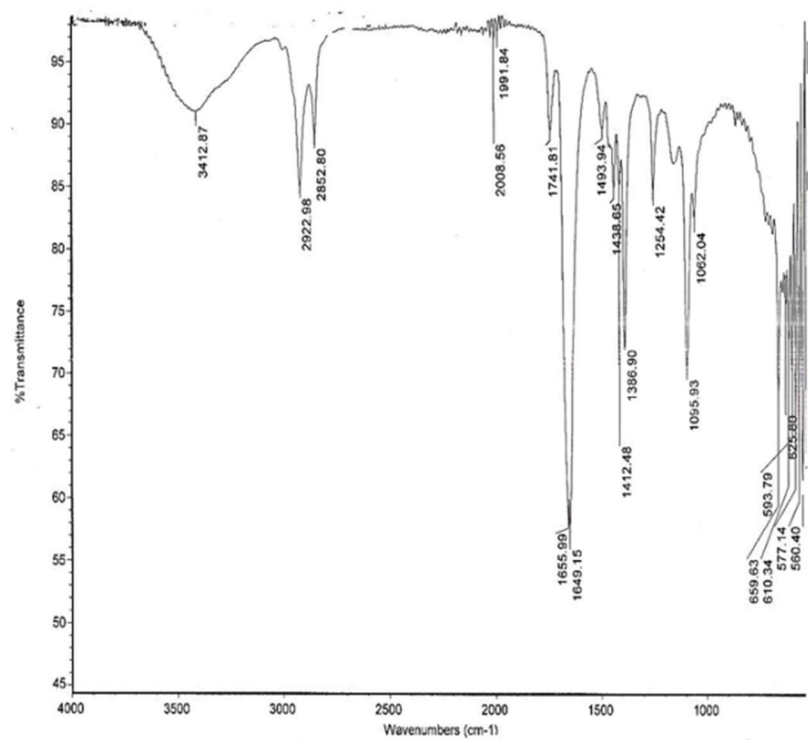

**S 8.** FT-IR spectrum of n-Hexane fraction of *A. arvensis*.

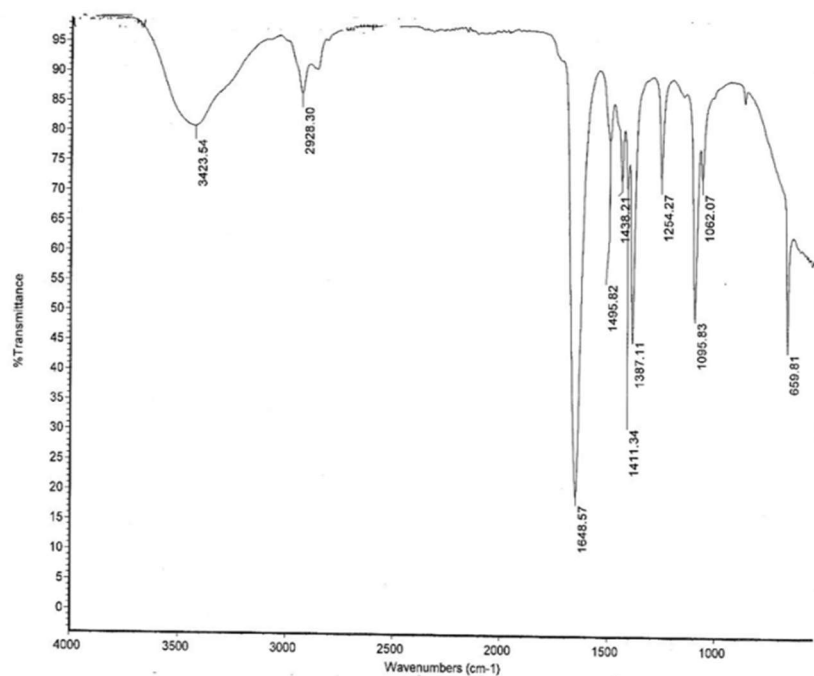

**S 9.** FT-IR spectrum of ethyl acetate fraction of *A. americana*.

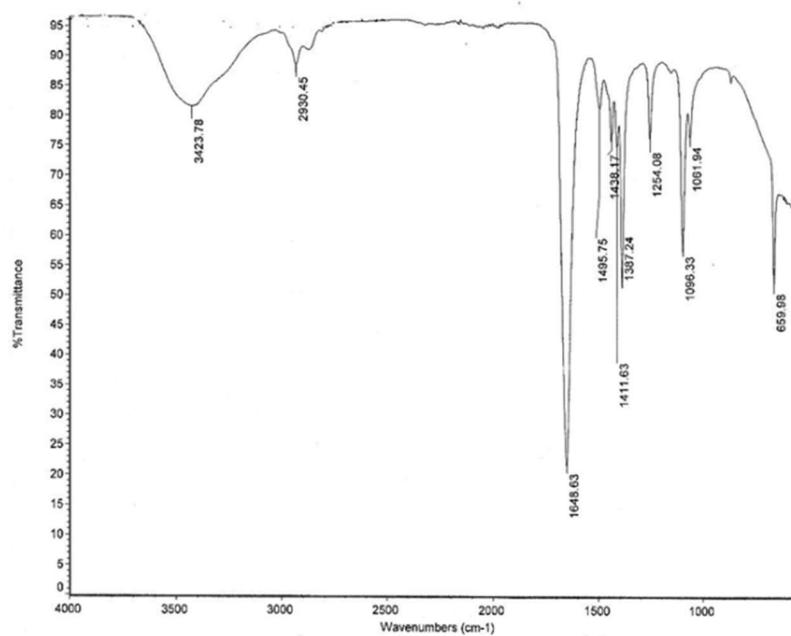

**S 10.** FT-IR spectrum of methanol fraction of *A. americana*.

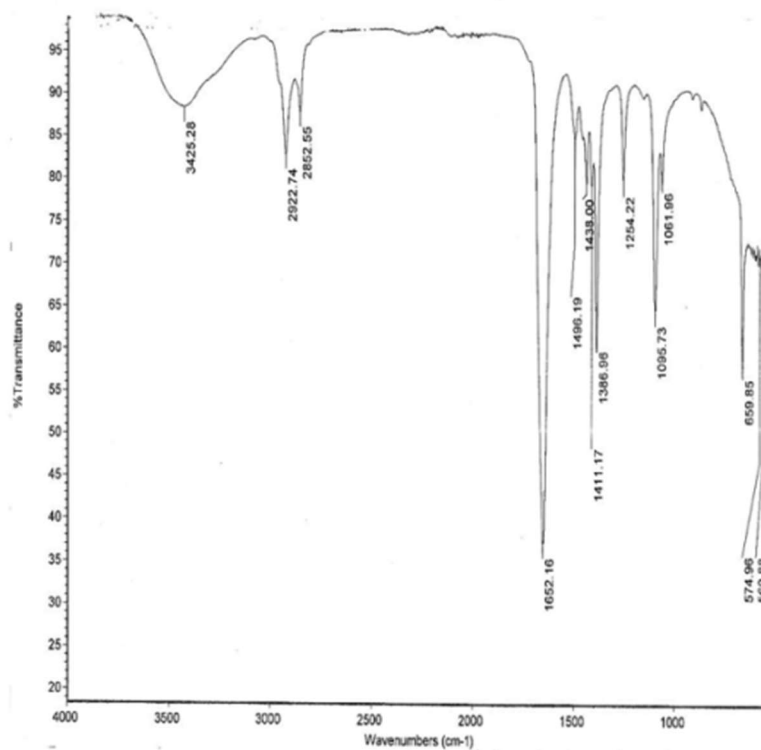

**S 11.** FT-IR spectrum of n-Hexane fraction of *A. americana*.
